# Supplementary material for: Will 1,2-dihydro-1,2-azaborine-based drugs resist metabolism by cytochrome P450 compound I?
Source: PeerJ. 2016 Jul 28;4:e2299. doi: 10.7717/peerj.2299 (PMC4974919; doi:10.7717/peerj.2299)
Supplement: Supplemental Information 3 [file peerj-04-2299-s003.xls]

## Sheet: Folha1
			Fe=O	Fe=O	Fe=O	Fe=O	Fe=O	Fe=O	Fe=O
			N1	B2	C3	C4	C5	C6	benzene
doublet	perpendicular	reactant	-0.129746	-0.129746	-0.129746	-0.129746	-0.129746	-0.129746	-0.122762
doublet	perpendicular	TS	-0.021462	-0.019323		-0.06584	-0.113533	-0.099321	-0.030595
doublet	perpendicular	product	0.041361	0.0627	0.14003	0.009911	0.036321	0.021538	-0.100147	0.022615
doublet	parallel	reactant	-0.12444	-0.12444	-0.12444	-0.12444	-0.12444	-0.12444	-0.105402
doublet	parallel	TS	-0.161609	-0.044865		-0.074699	-0.116358	-0.113484	-0.071191
doublet	parallel	product	-0.163286	0.046418	0.143992	0.00693	0.040448	0.018154	0.02809	0.133492
quartet	perpendicular	reactant	-0.119128	-0.119128	-0.119128	-0.119128	-0.119128	-0.119128	-0.121254
quartet	perpendicular	TS	0.13991	-0.042443		-0.076249	-0.097693	-0.095552	-0.080863
quartet	perpendicular	product	0.210952	0.063301	0.040637	0.031112	0.220502	-0.153826	0.033179	0.154433
quartet	parallel	reactant	-0.128957	-0.128957	-0.128957	-0.128957	-0.128957	-0.128957	-0.129437
quartet	parallel	TS		-0.065997	-0.096557	-0.087176	-0.1223	-0.122077	-0.075681
quartet	parallel	product		0.20278	0.013426	0.015138	0.215647	0.012562	0.034563	0.164
			porphyrin	porphyrin	porphyrin	porphyrin	porphyrin	porphyrin	porphyrin
			N1	B2	C3	C4	C5	C6	benzene
doublet	perpendicular	reactant	-0.145925	-0.145925	-0.145925	-0.145925	-0.145925	-0.145925	-0.162276
doublet	perpendicular	TS	-0.516386	-0.184323		-0.376499	-0.427519	-0.367042	-0.40134
doublet	perpendicular	product	-0.526016	-0.453646	-0.442355	-0.362272	-0.527568	-0.345239	-0.504862	-0.342586
doublet	parallel	reactant	-0.165508	-0.165508	-0.165508	-0.165508	-0.165508	-0.165508	-0.154272
doublet	parallel	TS	-0.467576	-0.170271		-0.357062	-0.394704	-0.321404	-0.36883
doublet	parallel	product	-0.162346	-0.415817	-0.456483	-0.369315	-0.532891	-0.317721	-0.367949	-0.213677
quartet	perpendicular	reactant	-0.163828	-0.163828	-0.163828	-0.163828	-0.163828	-0.163828	-0.163701
quartet	perpendicular	TS	-0.371271	-0.23035		-0.37755	-0.437571	-0.367122	-0.404461
quartet	perpendicular	product	-0.366183	-0.407969	-0.403638	-0.374528	-0.36256	0.036958	-0.374521	-0.21082
quartet	parallel	reactant	-0.146602	-0.146602	-0.146602	-0.146602	-0.146602	-0.146602	-0.16008
quartet	parallel	TS		-0.208762	-0.406761	-0.354094	-0.403201	-0.3639	-0.38445
quartet	parallel	product		-0.308036	-0.391261	-0.362817	-0.354139	-0.332636	-0.378748	-0.218668
			SCH3	SCH3	SCH3	SCH3	SCH3	SCH3	SCH3
			N1	B2	C3	C4	C5	C6	benzene
doublet	perpendicular	reactant	0.284843	0.284843	0.284843	0.284843	0.284843	0.284843	0.285036
doublet	perpendicular	TS	0.190468	0.19099		0.159176	0.119714	0.124422	0.094079
doublet	perpendicular	product	0.208339	0.185087	0.21934	0.244306	0.219123	0.255141	0.074807	-0.210229
doublet	parallel	reactant	0.289946	0.289946	0.289946	0.289946	0.289946	0.289946	0.262911
doublet	parallel	TS	0.128018	0.172391		0.166811	0.129265	0.123927	0.139269
doublet	parallel	product	0.109826	0.185335	0.2204	0.245693	0.217591	0.243394	0.219378	-0.043533
quartet	perpendicular	reactant	0.282956	0.282956	0.282956	0.282956	0.282956	0.282956	0.284957
quartet	perpendicular	TS	-0.00037	0.234221		0.237324	0.186163	0.153665	0.206772
quartet	perpendicular	product	0.003314	0.180477	0.204987	0.236077	-0.003555	0.136156	0.218734	-0.066223
quartet	parallel	reactant	0.285844	0.285844	0.285844	0.285844	0.285844	0.285844	0.26973
quartet	parallel	TS		0.224971	0.165497	0.238782	0.171267	0.146438	0.171376
quartet	parallel	product		0.078229	0.215707	0.241948	-0.000771	0.260037	0.214864	-0.054866
			substrate	substrate	substrate	substrate	substrate	substrate	substrate
			N1	B2	C3	C4	C5	C6	benzene
doublet	perpendicular	reactant	-0.009173	-0.009173	-0.009173	-0.009173	-0.009173	-0.009173	0
doublet	perpendicular	TS	0.347381	0.012658		0.283164	0.421335	0.341939	0.337854
doublet	perpendicular	product	0.276314	0.205858	0.082982	0.108056	0.272123	0.068559	0.530199	0.530199
doublet	parallel	reactant	-1e-06	-1e-06	-1e-06	-1e-06	-1e-06	-1e-06	-0.003239
doublet	parallel	TS	0.501171	0.042744		0.264952	0.381798	0.310959	0.300751
doublet	parallel	product	0.215807	0.184064	0.092093	0.116694	0.274851	0.056172	0.12048	0.123719
quartet	perpendicular	reactant	-1e-06	-1e-06	-1e-06	-1e-06	-1e-06	-1e-06	0
quartet	perpendicular	TS	0.23173	0.038574		0.216478	0.349104	0.309007	0.278552
quartet	perpendicular	product	0.151916	0.164192	0.158014	0.107337	0.145611	-0.019288	0.12261	0.12261
quartet	parallel	reactant	-1e-06	-0.010284	-0.010284	-0.010284	-0.010284	-0.010284	0.019786
quartet	parallel	TS		0.049784	0.337822	0.202488	0.354234	0.339541	0.288754
quartet	parallel	product		0.027028	0.162124	0.105729	0.139261	0.060037	0.129319	0.109533
			benzene + FeO	benzene + FeO	benzene + FeO	benzene + FeO	benzene + FeO	benzene + FeO	benzene + FeO
			N1	B2	C3	C4	C5	C6	benzene
doublet	perpendicular	reactant	-0.138919	-0.138919	-0.138919	-0.138919	-0.138919	-0.138919	-0.122762
doublet	perpendicular	TS	0.325919	-0.006665	0	0.217324	0.307802	0.242618	0.307259
doublet	perpendicular	product	0.317675	0.268558	0.223012	0.117967	0.308444	0.090097	0.430052	0.552814
doublet	parallel	reactant	-0.124441	-0.124441	-0.124441	-0.124441	-0.124441	-0.124441	-0.108641
doublet	parallel	TS	0.339562	-0.002121	0	0.190253	0.26544	0.197475	0.22956
doublet	parallel	product	0.052521	0.230482	0.236085	0.123624	0.315299	0.074326	0.14857	0.257211
quartet	perpendicular	reactant	-0.119129	-0.119129	-0.119129	-0.119129	-0.119129	-0.119129	-0.121254
quartet	perpendicular	TS	0.37164	-0.003869	0	0.140229	0.251411	0.213455	0.197689
quartet	perpendicular	product	0.362868	0.227493	0.198651	0.138449	0.366113	-0.173114	0.155789	0.277043
quartet	parallel	reactant	-0.128958	-0.139241	-0.139241	-0.139241	-0.139241	-0.139241	-0.109651
quartet	parallel	TS	0	-0.016213	0.241265	0.115312	0.231934	0.217464	0.213073
quartet	parallel	product	0	0.229808	0.17555	0.120867	0.354908	0.072599	0.163882	0.273533
